# Supplementary material for: Multiple crystallization pathways of amorphous calcium carbonate in the presence of poly(aspartic acid) with a chain length of 30
Source: Royal Society of Chemistry journal article supplement (doi:10.1039/d2ce00328g), 2022-01-01
Supplement: d2ce00328g1.pdf [file d2ce00328g1.pdf]

## Supplementary information

### Multiple Crystallization Pathways of Amorphous Calcium Carbonate in the Presence of Poly(Aspartic acid) with a Chain Length of 30

Wenyang Huang, ‡ Qihang Wang, ‡ Wenhao Chi, Meng Cai, Rongjie Wang, Zhengyi Fu, Jingjing Xie\*, Zhaoyong Zou\*

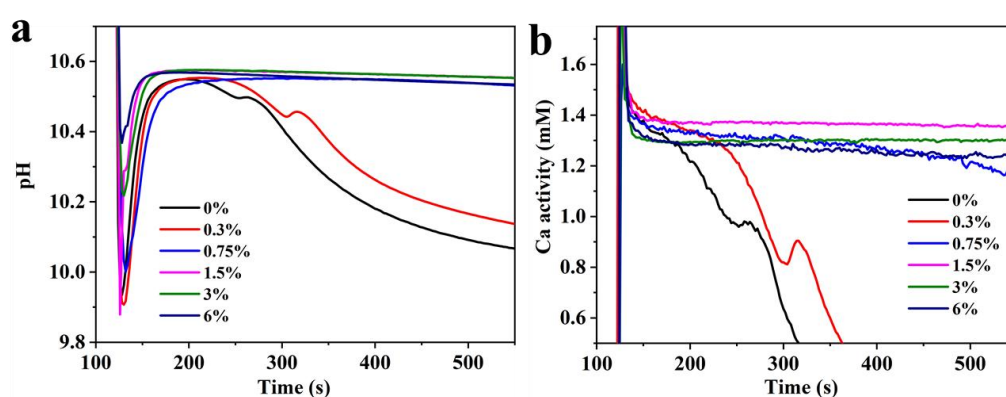

**Figure S1.** a) The pH and b) Ca<sup>2+</sup> activity evolution of the reaction at different concentrations of pAsp-30 in the first 550 s.

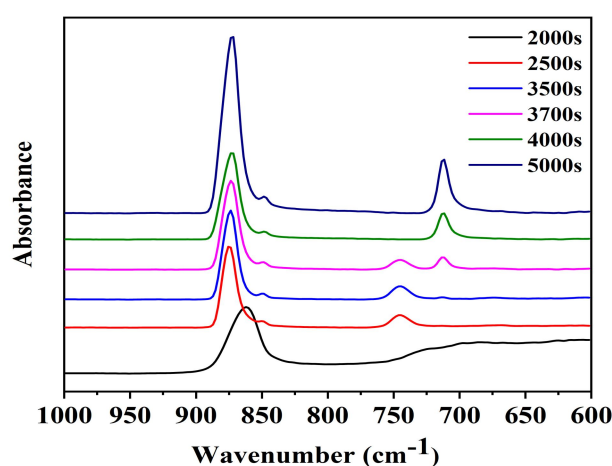

**Figure S2.** Infrared spectra of sample extracted at different times from the reaction solution at 1.5% of pAsp-30.

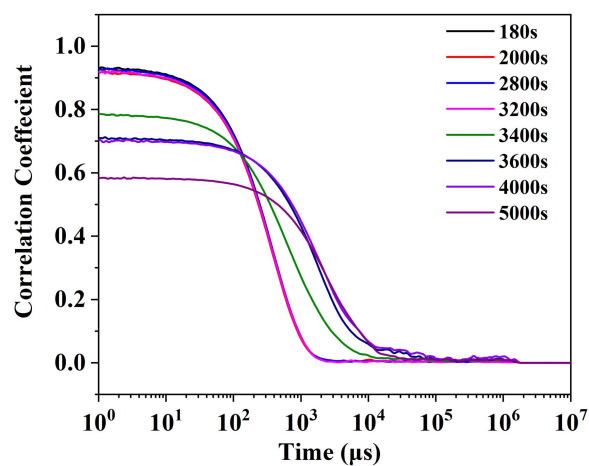

**Figure S3.** The correlation coefficient data from the DLS measurements of the reaction solution at 1.5% of pAsp-30.

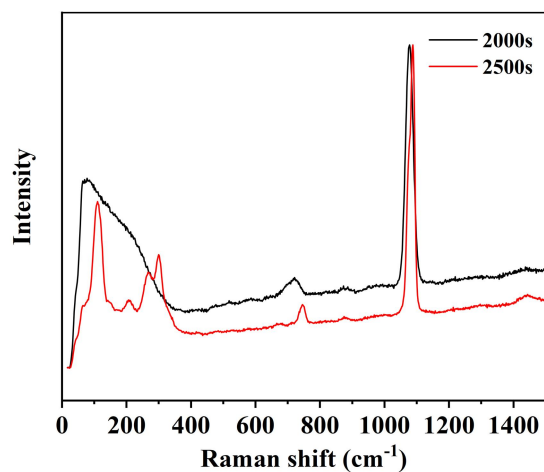

**Figure S4.** Raman spectra of samples extracted at different times for the reaction in the presence of 1.5% pAsp-30: 2000 s and 2500 s.
